# Supplementary material
Source: PubMed Central journal article supplement (PMC8205437)
Supplement: NIHMS1692852-supplement-Supplementary_Tables.pdf [file NIHMS1692852-supplement-Supplementary_Tables.pdf]

**Supplementary Table 1. KRAS, LKB1 and TP53 genes mutations status of TCGA patient samples analyzed**

| genotype | Patient ID       | KRAS                                | LKB1                                   | TP53                                  |
|----------|------------------|-------------------------------------|----------------------------------------|---------------------------------------|
| KL       | TCGA-86-7713-01A | Missense Mutation (putative driver) | Missense Mutation (putative passenger) |                                       |
| KL       | TCGA-78-7167-01A | Missense Mutation (putative driver) | Truncating mutation (putative driver)  |                                       |
| KL       | TCGA-44-7671-01A | Missense Mutation (putative driver) | Truncating mutation (putative driver)  |                                       |
| KL       | TCGA-44-6776-01A | Missense Mutation (putative driver) | Truncating mutation (putative driver)  |                                       |
| KL       | TCGA-64-5774-01A | Missense Mutation (putative driver) | Truncating mutation (putative driver)  |                                       |
| KL       | TCGA-73-7498-01A | Missense Mutation (putative driver) | Truncating mutation (putative driver)  |                                       |
| KL       | TCGA-78-7161-01A | Missense Mutation (putative driver) | Truncating mutation (putative driver)  |                                       |
| KL       | TCGA-91-6849-01A | Missense Mutation (putative driver) | Truncating mutation (putative driver)  |                                       |
| KL       | TCGA-55-6983-01A | Missense Mutation (putative driver) | Truncating mutation (putative driver)  |                                       |
| KL       | TCGA-50-5932-01A | Missense Mutation (putative driver) | Missense Mutation (putative driver)    |                                       |
| KL       | TCGA-50-7109-01A | Missense Mutation (putative driver) | Missense Mutation (putative driver)    |                                       |
| KL       | TCGA-53-7813-01A | Missense Mutation (putative driver) | Truncating mutation (putative driver)  |                                       |
| KL       | TCGA-35-3615-01A | Missense Mutation (putative driver) | Truncating mutation (putative driver)  |                                       |
| KL       | TCGA-05-4417-01A | Missense Mutation (putative driver) | Missense Mutation (putative passenger) |                                       |
| KL       | TCGA-78-7160-01A | Missense Mutation (putative driver) | Truncating mutation (putative driver)  |                                       |
| KL       | TCGA-78-7148-01A | Missense Mutation (putative driver) | Truncating mutation (putative driver)  |                                       |
| KL       | TCGA-55-6970-01A | Missense Mutation (putative driver) | Truncating mutation (putative driver)  |                                       |
| KL       | TCGA-78-7166-01A | Missense Mutation (putative driver) | Missense Mutation (putative driver)    |                                       |
| KL       | TCGA-80-5608-01A | Missense Mutation (putative driver) | Truncating mutation (putative driver)  |                                       |
| KP       | TCGA-64-5778-01A | Missense Mutation (putative driver) |                                        | Missense Mutation (putative driver)   |
| KP       | TCGA-50-5941-01A | Missense Mutation (putative driver) |                                        | Truncating mutation (putative driver) |
| KP       | TCGA-64-1677-01A | Missense Mutation (putative driver) |                                        | Truncating mutation (putative driver) |
| KP       | TCGA-49-4505-01A | Missense Mutation (putative driver) |                                        | Missense Mutation (putative driver)   |
| KP       | TCGA-69-7980-01A | Missense Mutation (putative driver) |                                        | Truncating mutation (putative driver) |
| KP       | TCGA-55-7911-01A | Missense Mutation (putative driver) |                                        | Missense Mutation (putative driver)   |
| KP       | TCGA-97-7554-01A | Missense Mutation (putative driver) |                                        | Missense Mutation (putative driver)   |
| KP       | TCGA-99-7458-01A | Missense Mutation (putative driver) |                                        | Truncating mutation (putative driver) |
| KP       | TCGA-50-5933-01A | Missense Mutation (putative driver) |                                        | Truncating mutation (putative driver) |
| KP       | TCGA-44-6777-01A | Missense Mutation (putative driver) |                                        | Missense Mutation (putative driver)   |
| KP       | TCGA-55-7283-01A | Missense Mutation (putative driver) |                                        | Truncating mutation (putative driver) |
| KP       | TCGA-78-7540-01A | Missense Mutation (putative driver) |                                        | Missense Mutation (putative driver)   |
| KP       | TCGA-05-4430-01A | Missense Mutation (putative driver) |                                        | Missense Mutation (putative driver)   |
| KP       | TCGA-95-7567-01A | Missense Mutation (putative driver) |                                        | Missense Mutation (putative driver)   |
| KP       | TCGA-55-7576-01A | Missense Mutation (putative driver) |                                        | Truncating mutation (putative driver) |
| KP       | TCGA-95-7039-01A | Missense Mutation (putative driver) |                                        | Missense Mutation (putative driver)   |
| KP       | TCGA-55-7726-01A | Missense Mutation (putative driver) |                                        | Truncating mutation (putative driver) |
| KP       | TCGA-55-7907-01A | Missense Mutation (putative driver) |                                        | Missense Mutation (putative driver)   |
| KP       | TCGA-64-5775-01A | Missense Mutation (putative driver) |                                        | Missense Mutation (putative driver)   |
| KP       | TCGA-97-7938-01A | Missense Mutation (putative driver) |                                        | Truncating mutation (putative driver) |
| KP       | TCGA-78-7145-01A | Missense Mutation (putative driver) |                                        | Missense Mutation (putative driver)   |
| KP       | TCGA-05-4405-01A | Missense Mutation (putative driver) |                                        | Missense Mutation (putative driver)   |

**Supplementary Table 2. Primer sequences for realtime PCR**

|             |                          |
|-------------|--------------------------|
| mTAP1-F1    | GACTCCTTGCTCTCCACTCAGT   |
| mTAP1-R1    | AACGCTGTCACCGTTCCAGGAT   |
| hTAP1-F1    | GCAGTCAACTCCTGGACCACTA   |
| hTAP1-R1    | CAAGGTTCCCACTGCTTACAGC   |
| mTapasin-F1 | GAGATGCTGAAGTTGGAGCTGTC  |
| mTapasin-R1 | GGTCTCTGATGTCACCTGGAAC   |
| hTapasin-F1 | GAGCCTGTTCTCATCACCATGG   |
| hTapasin-R1 | GTAGGCAAAGCTCAAGTCCAGC   |
| mB2M-F1     | ACAGTTCACCCGCCTCACATT    |
| mB2m-R1     | TAGAAAGACCAGTCCTTGCTGAAG |
| hB2M-F1     | CCACTGAAAAAGATGAGTATGCCT |
| hB2m-R1     | CCAATCCAAATGCGGCATCTTCA  |
| mPSMB9-F1   | TACCGTGAGGACTTGTTAGCGC   |
| mPSMB9-R1   | GGCTGTCGAATTAGCATCCCTC   |
| hPSMB9-F1   | CGAGAGGACTTGTCTGCACATC   |
| hPSMB9-R1   | CACCAATGGCAAAGGCTGTCTG   |
| mPSMB8-F1   | CCTTACCTGCTTGGCACCATGT   |
| mPSMB8-R1   | TTGGATGCTGCAGACACGGAGA   |
| hPSMB8-F1   | CCTTACCTGCTTGGCACCATGT   |
| hPSMB8-R1   | TTGGAGGCTGCCGACACTGAAA   |
| mPA28-F1    | TCACTACCTGGTTGCAGCTACAG  |
| mPA28-R1    | GGTGTGAAGGTTGGTCATCAGC   |
| hPA28-F1    | TGATGACCAGCCTCCACACCAA   |
| hPA28-R1    | TACTCTGCCTCATCCAGCTCGT   |
| mPSMB5-F1   | CTGTGGCTGGGATAAGAGAGGC   |
| mPSMB5-R1   | CAGGTCATAGGAGTAGCCTCGA   |
| hPSMB5-F1   | GTGTCCCAGAAGAGCCAGGAAT   |
| hPSMB5-R1   | TCTTCACCGTCTGGGAGGCAAT   |
| mPSMB6-F1   | GGCATGACCAAGGACGAATGTC   |
| mPSMB6-R1   | TTGGTCTCCCAAAGCACCTGC    |
| hPSMB6-F1   | CGTTCACCTCCAGACTGGGAAAG  |
| hPSMB6-R1   | CGGTCTGTAATAGGTGTCAGCT   |
| hHLA-A-F1   | AGATACACCTGCCATGTGCAGC   |
| hHLA-A-R1   | GATCACAGCTCCAAGGAGAACC   |
| hHLA-B-F1   | CTGCTGTGATGTGTAGGAGGAAG  |
| hHLA-B-R1   | GCTGTGAGAGACACATCAGAGC   |
| hHLA-C-F1   | GGAGACACAGAAGTACAAGCGC   |
| hHLA-C-R1   | ACATCCTCTGGAGGGTGTGAGA   |
| mH2-D-F1    | TGAGGAACCTGCTCGGCTACTA   |
| mH2-D-R1    | GGTCTTCGTTCAAGGCGATGTA   |
| mH2-K-F1    | GGCAATGAGCAGAGTTTCCGAG   |
| mH2-K-R1    | CCACTTCACAGCCAGAGATCAC   |
