# Supplementary material
Source: PubMed Central journal article supplement (PMC8205437)

Source Data Fig. 2

Fig. 2d chromatin fraction

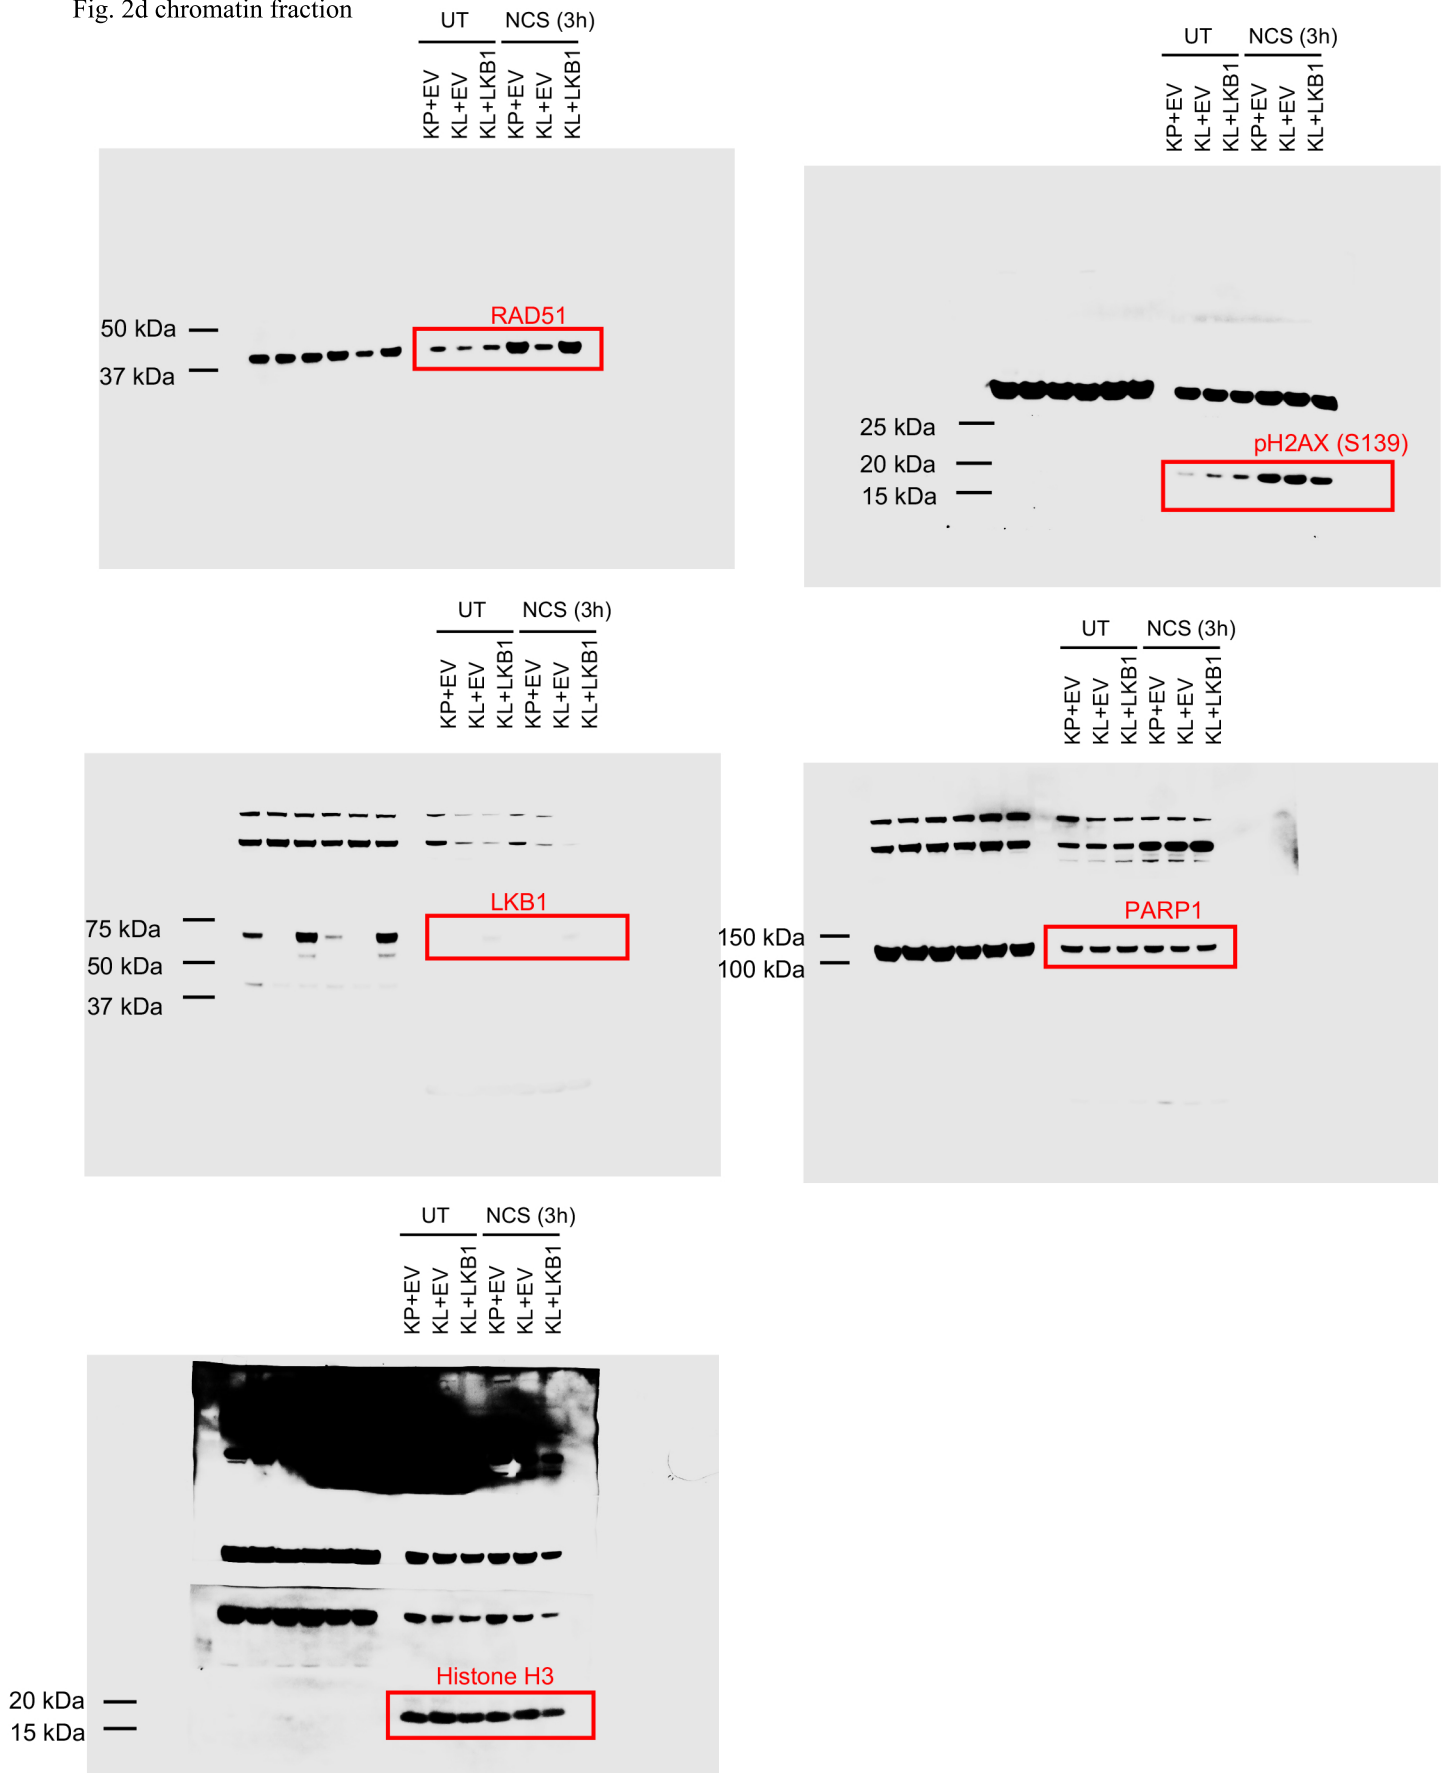

Source Data Fig. 2

Fig. 2d soluble fraction

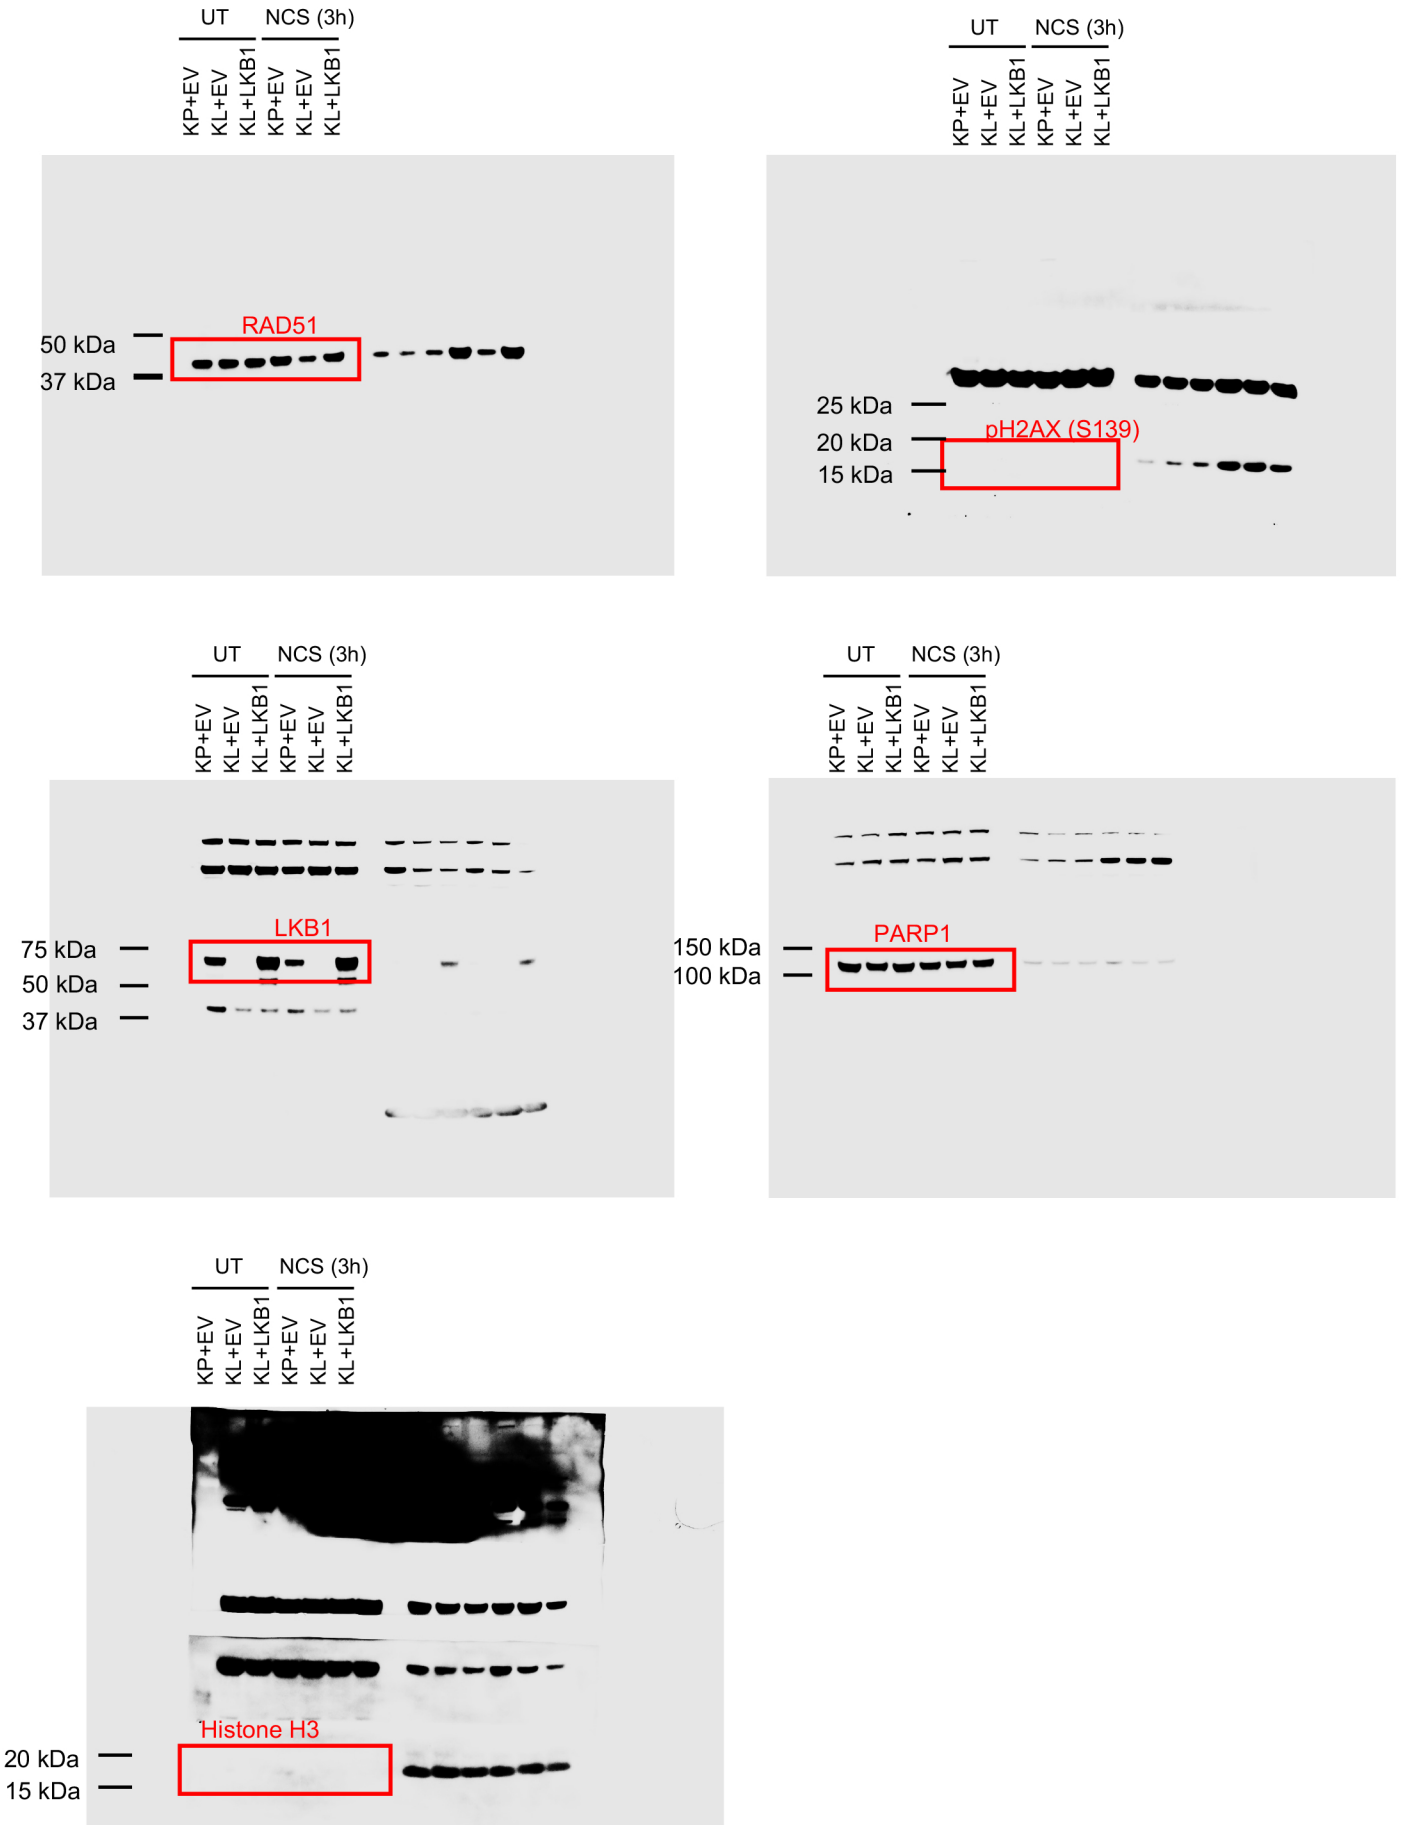

Supplement: NIHMS1692852-supplement-source_data_Fig__2_WB.pdf [file NIHMS1692852-supplement-source_data_Fig__2_WB.pdf]

Source Data Fig. 5c

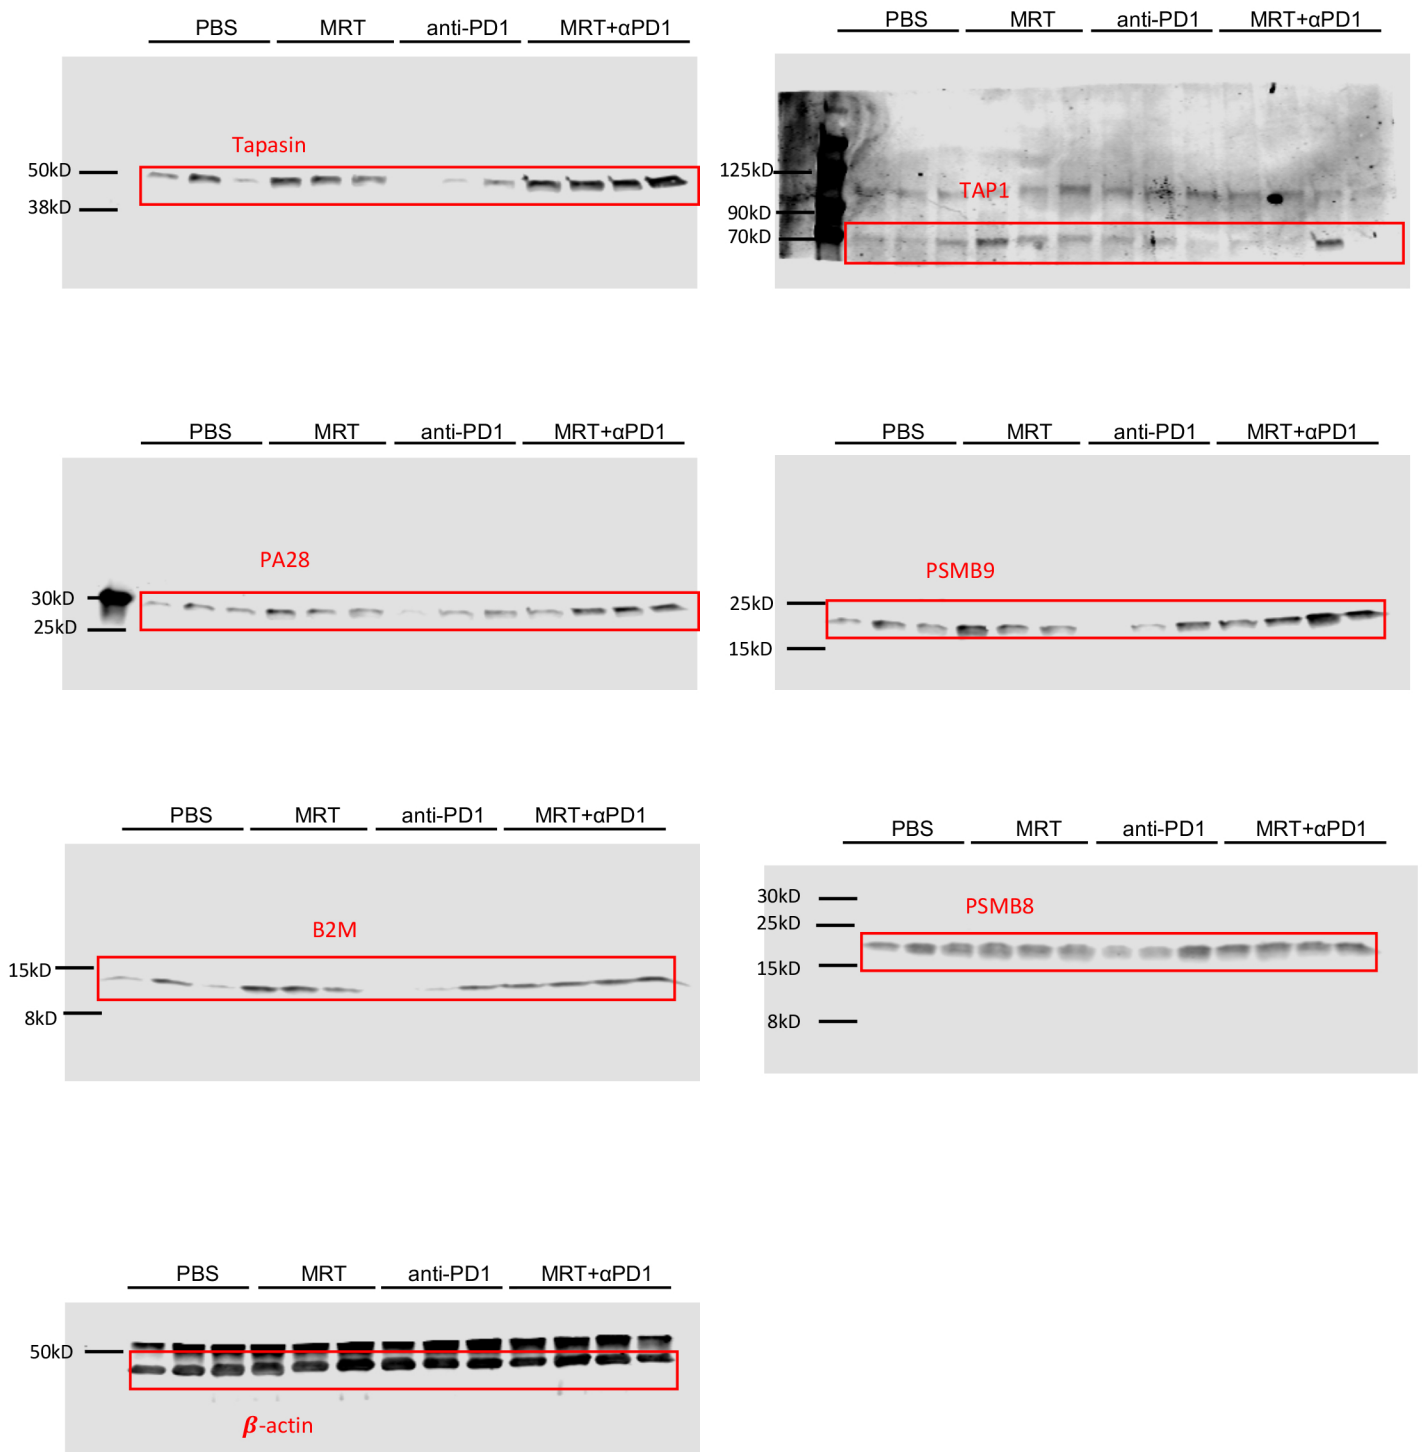

Supplement: NIHMS1692852-supplement-source_data_Fig__5_WB.pdf [file NIHMS1692852-supplement-source_data_Fig__5_WB.pdf]

Source Data Extended Data Fig. 1c

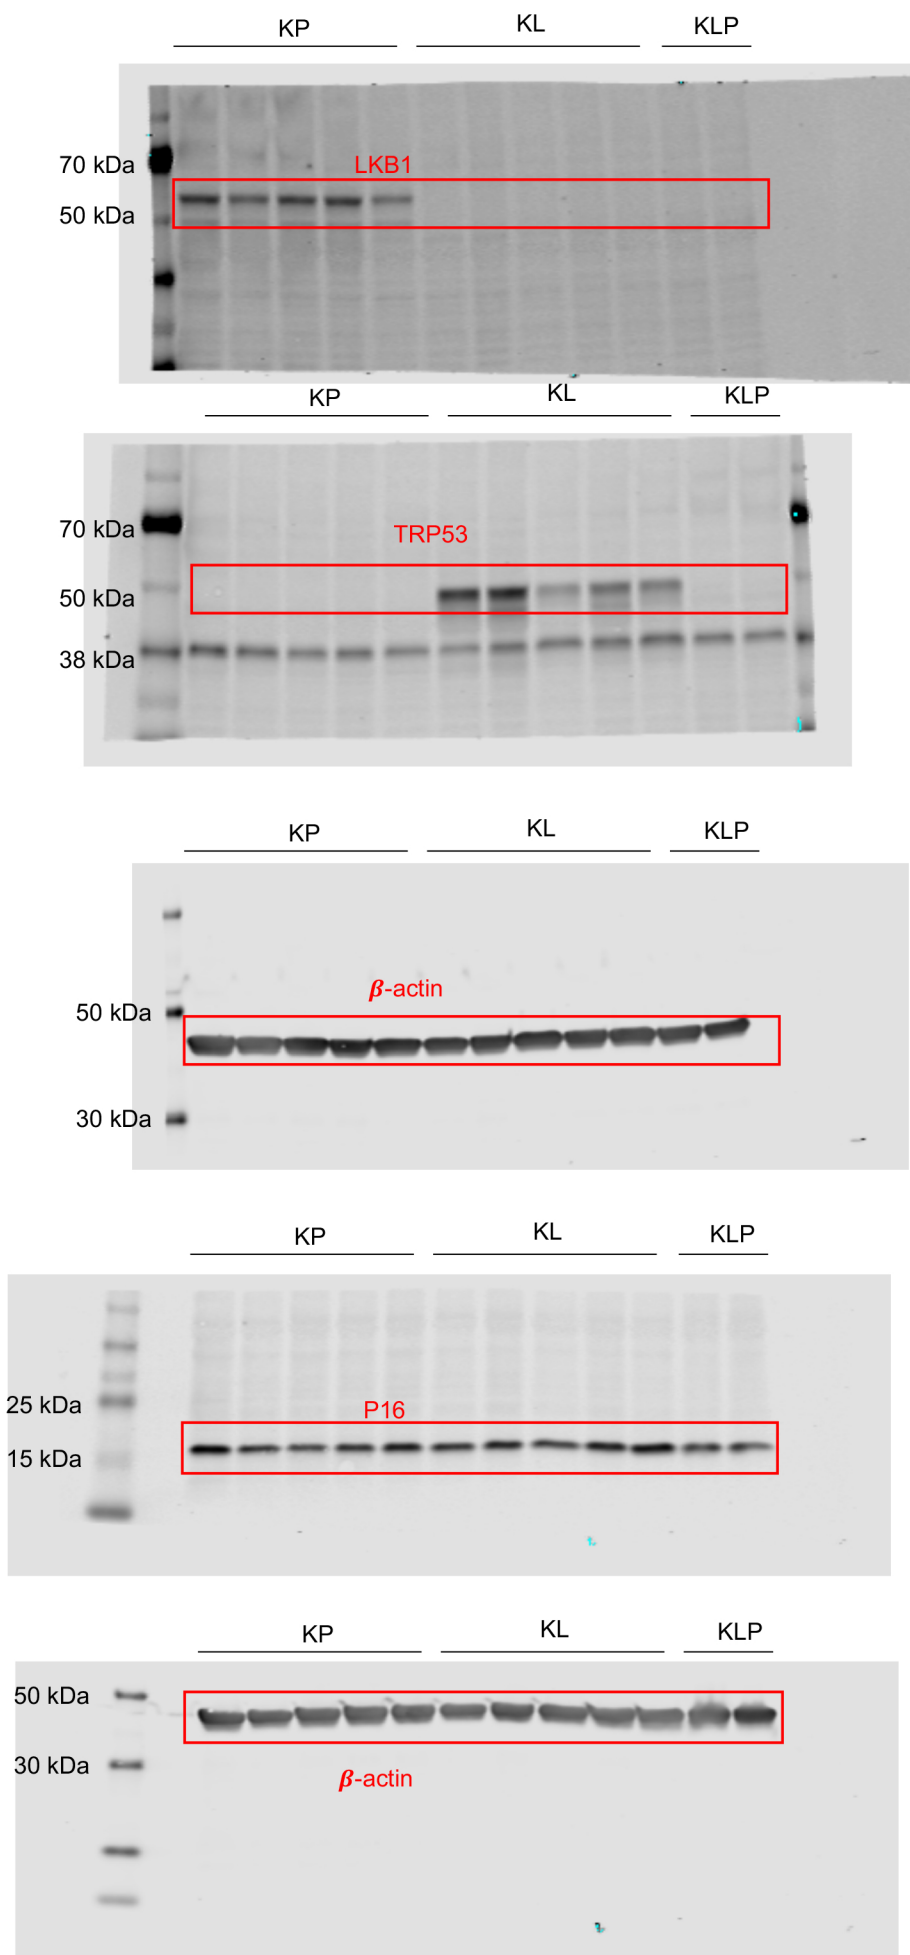

Supplement: NIHMS1692852-supplement-source_data_Fig__S1_WB.pdf [file NIHMS1692852-supplement-source_data_Fig__S1_WB.pdf]

Source Extended Data Fig. 3d IP

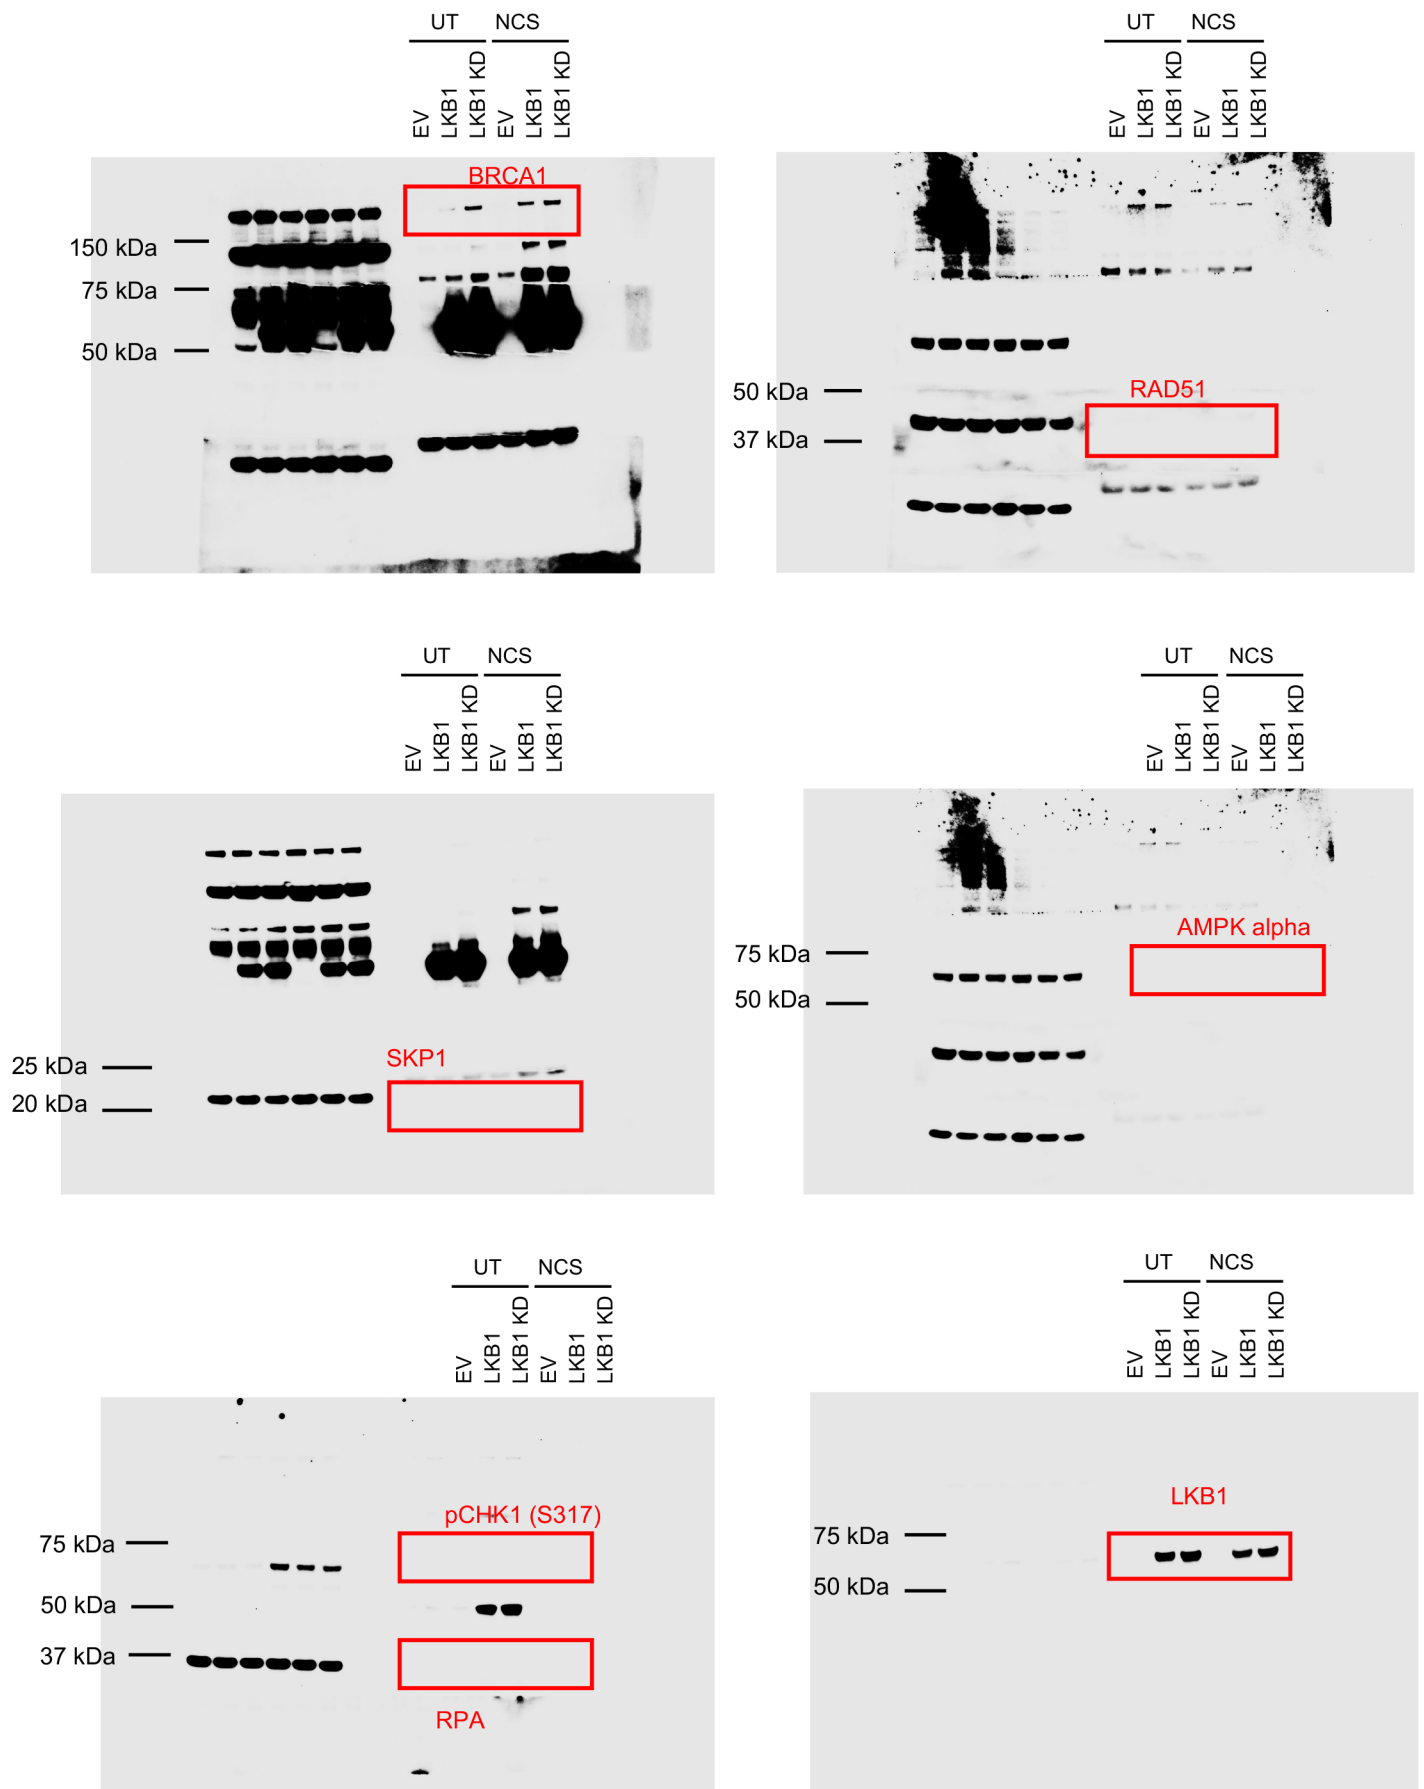

Source Extended Data Fig. 3d WCE

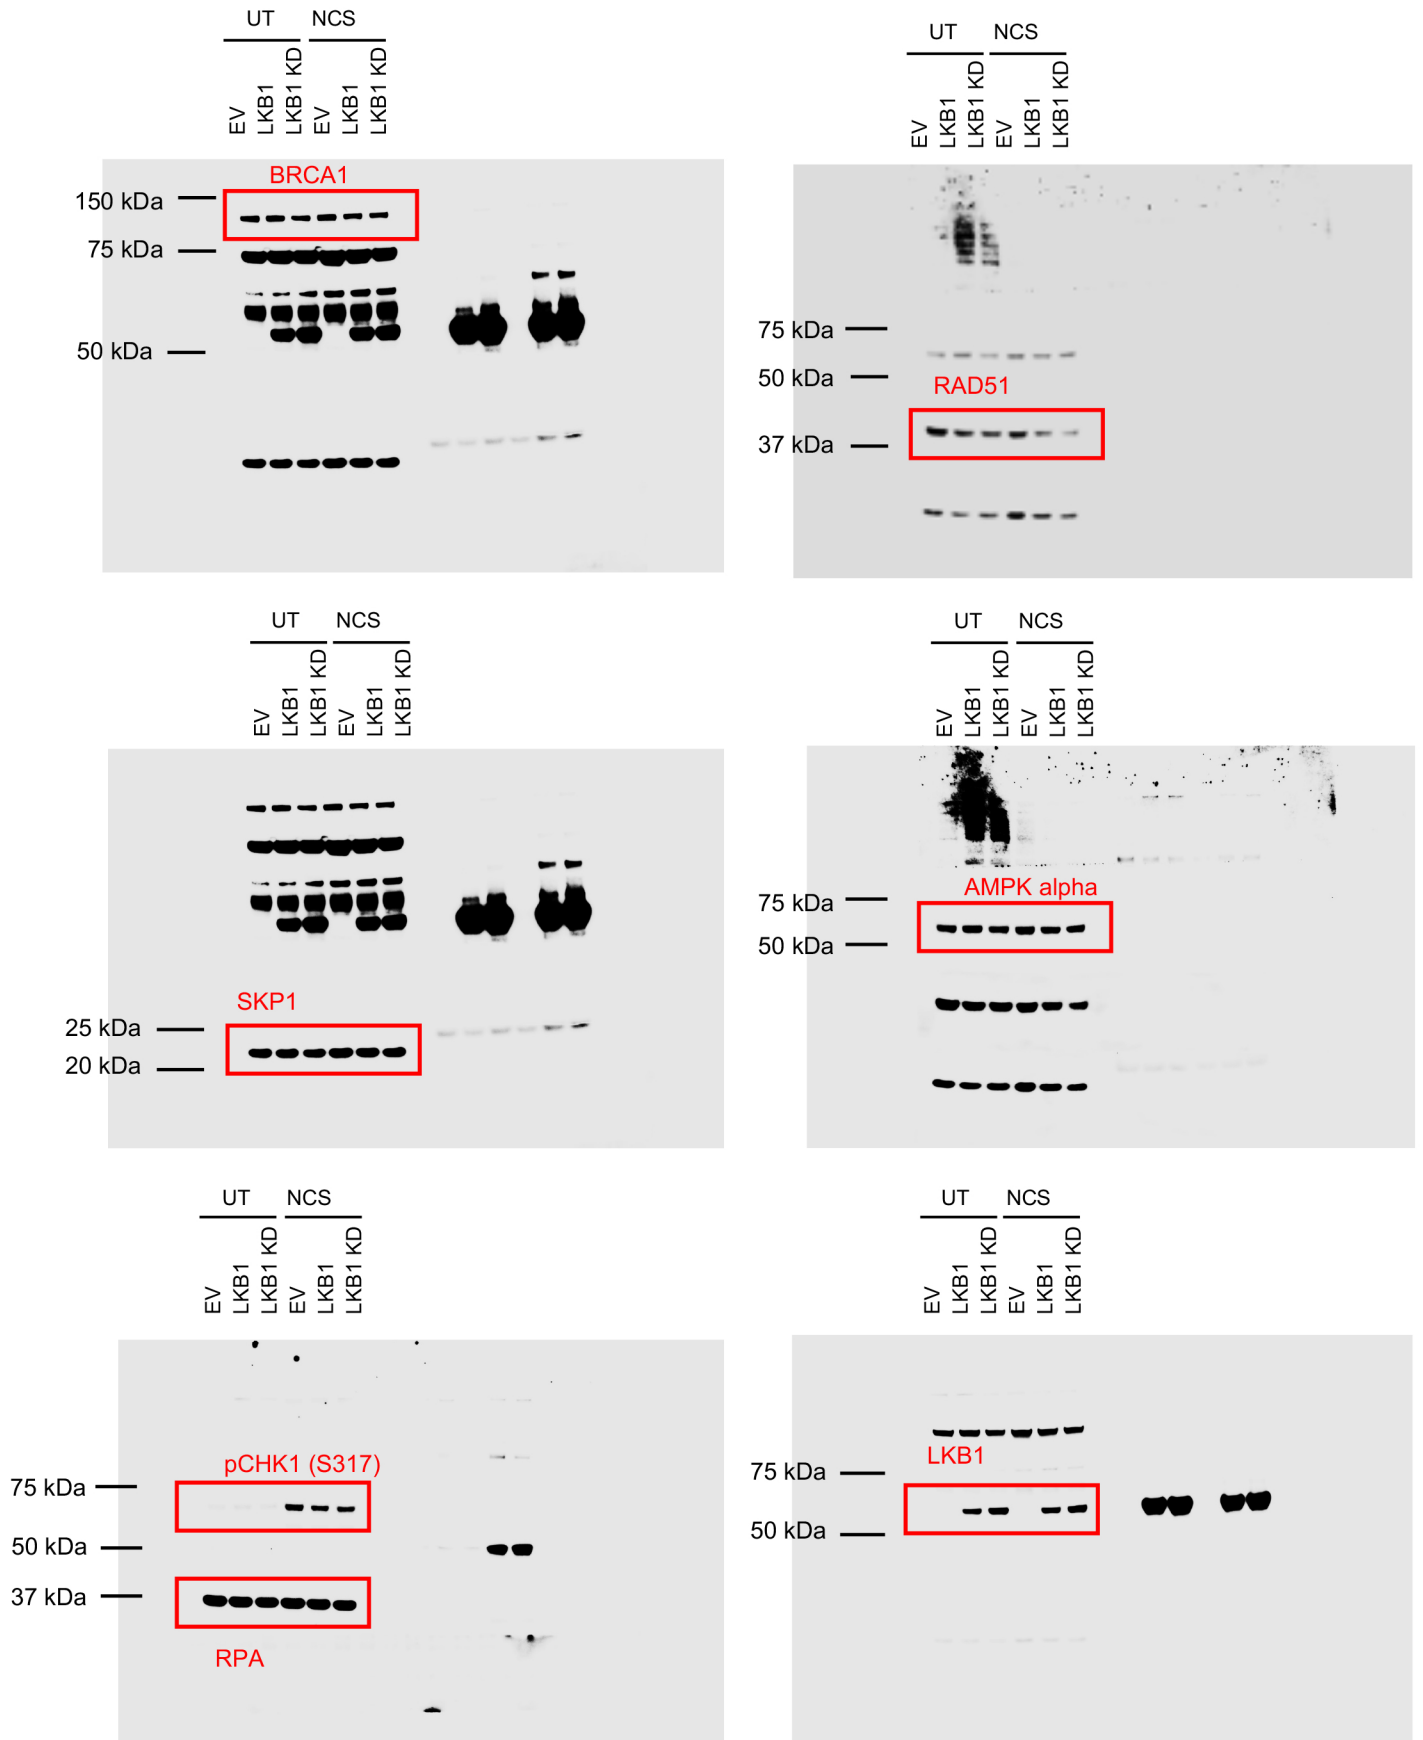

Supplement: NIHMS1692852-supplement-source_data_Fig__S3_WB.pdf [file NIHMS1692852-supplement-source_data_Fig__S3_WB.pdf]

Source Data Extended Data Fig. 4b

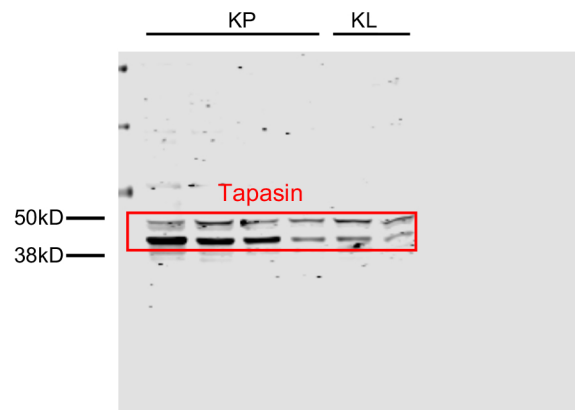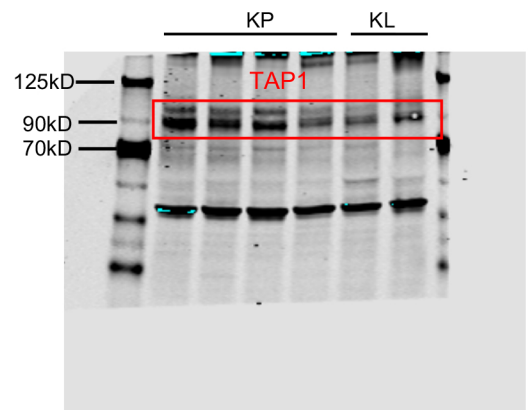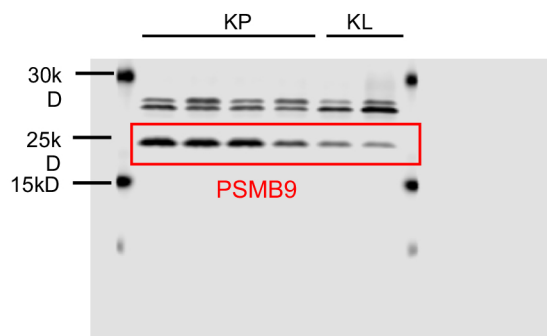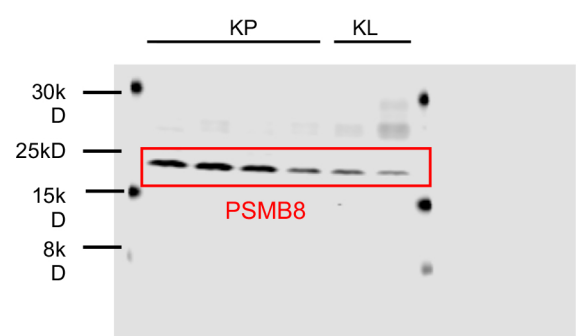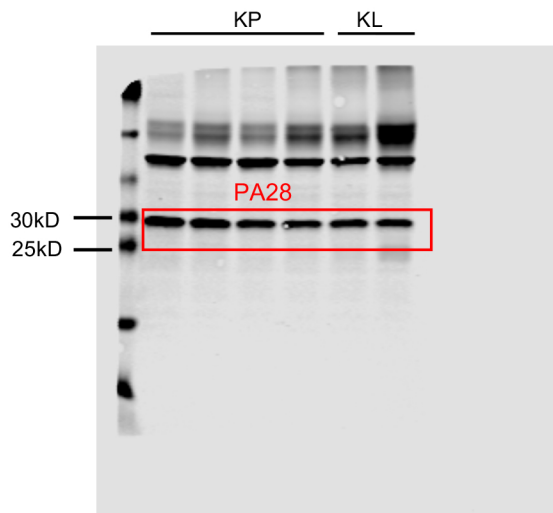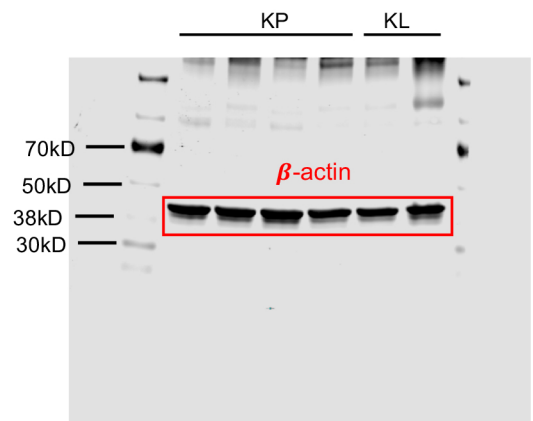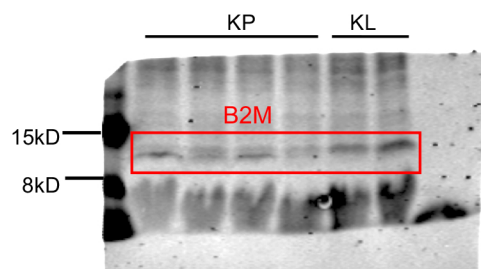

Source Data Extended Data Fig. 4b

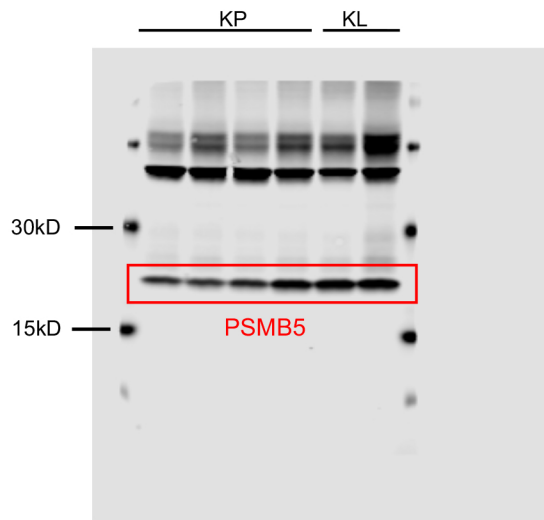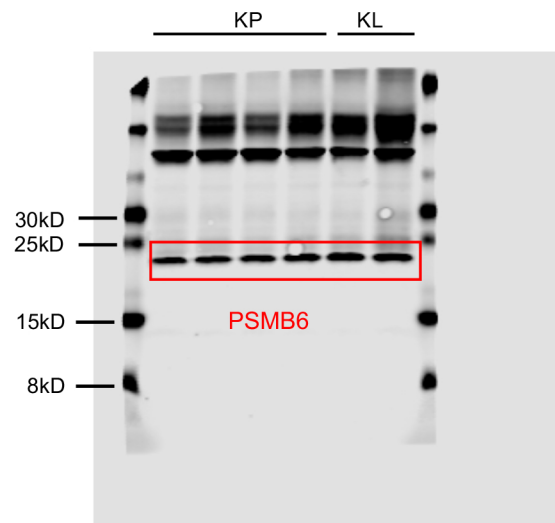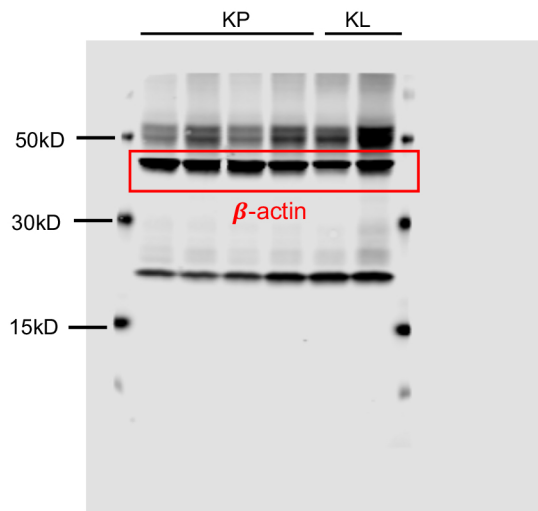

Supplement: NIHMS1692852-supplement-source_data_Fig__S4_WB.pdf [file NIHMS1692852-supplement-source_data_Fig__S4_WB.pdf]

Source Data Extended Data Fig. 6d

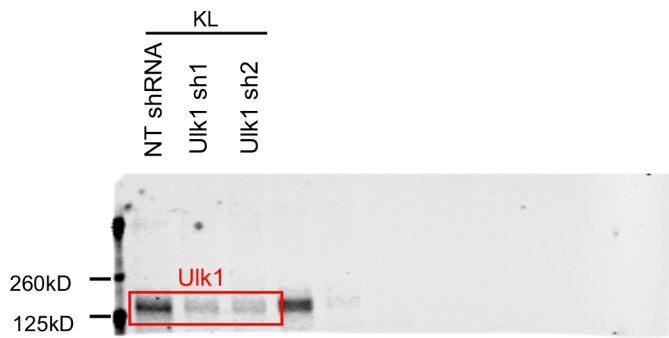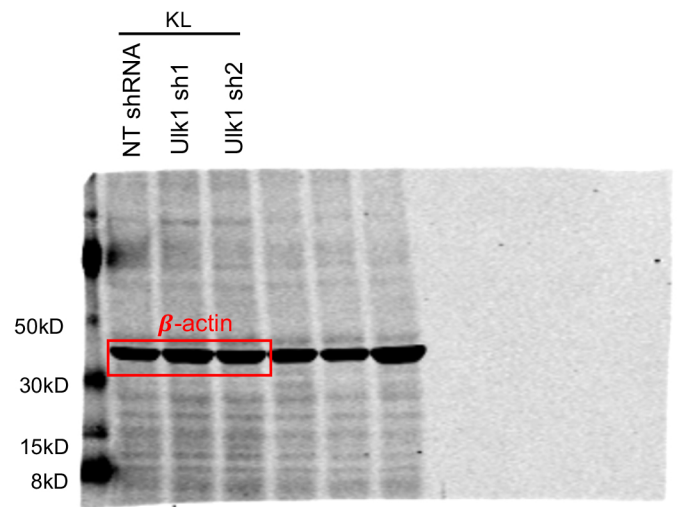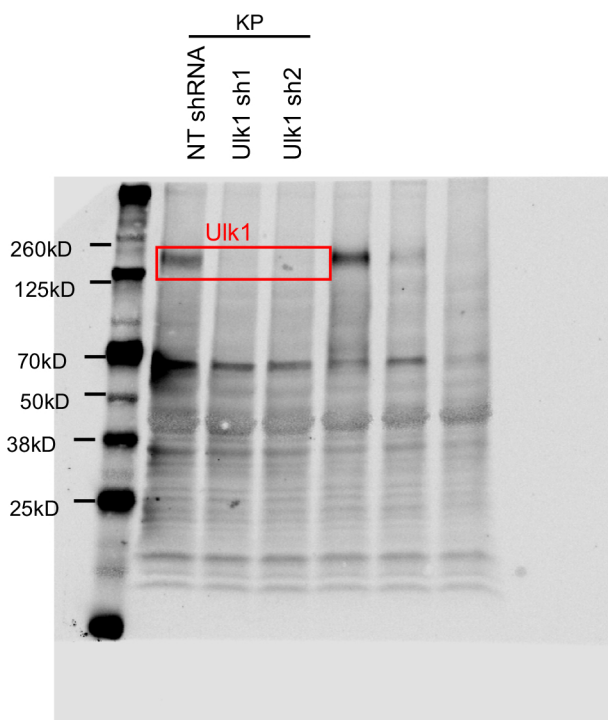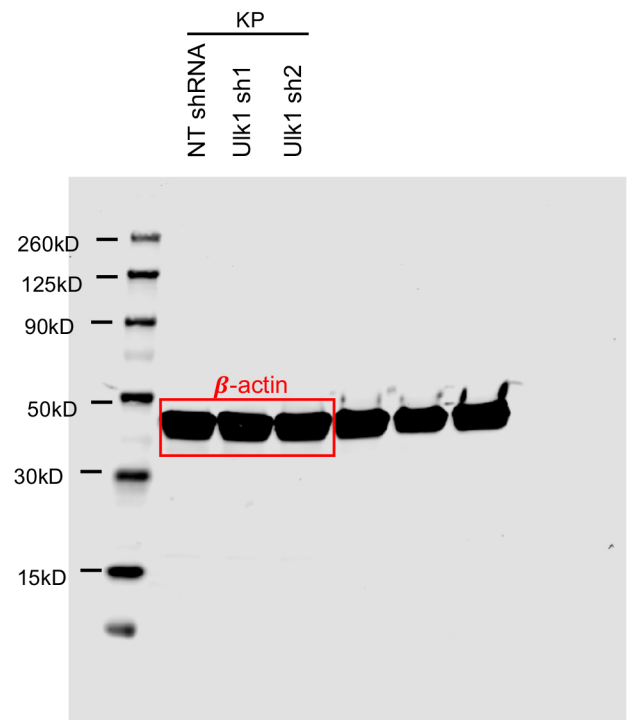

Source Data Extended Data Fig. 6c

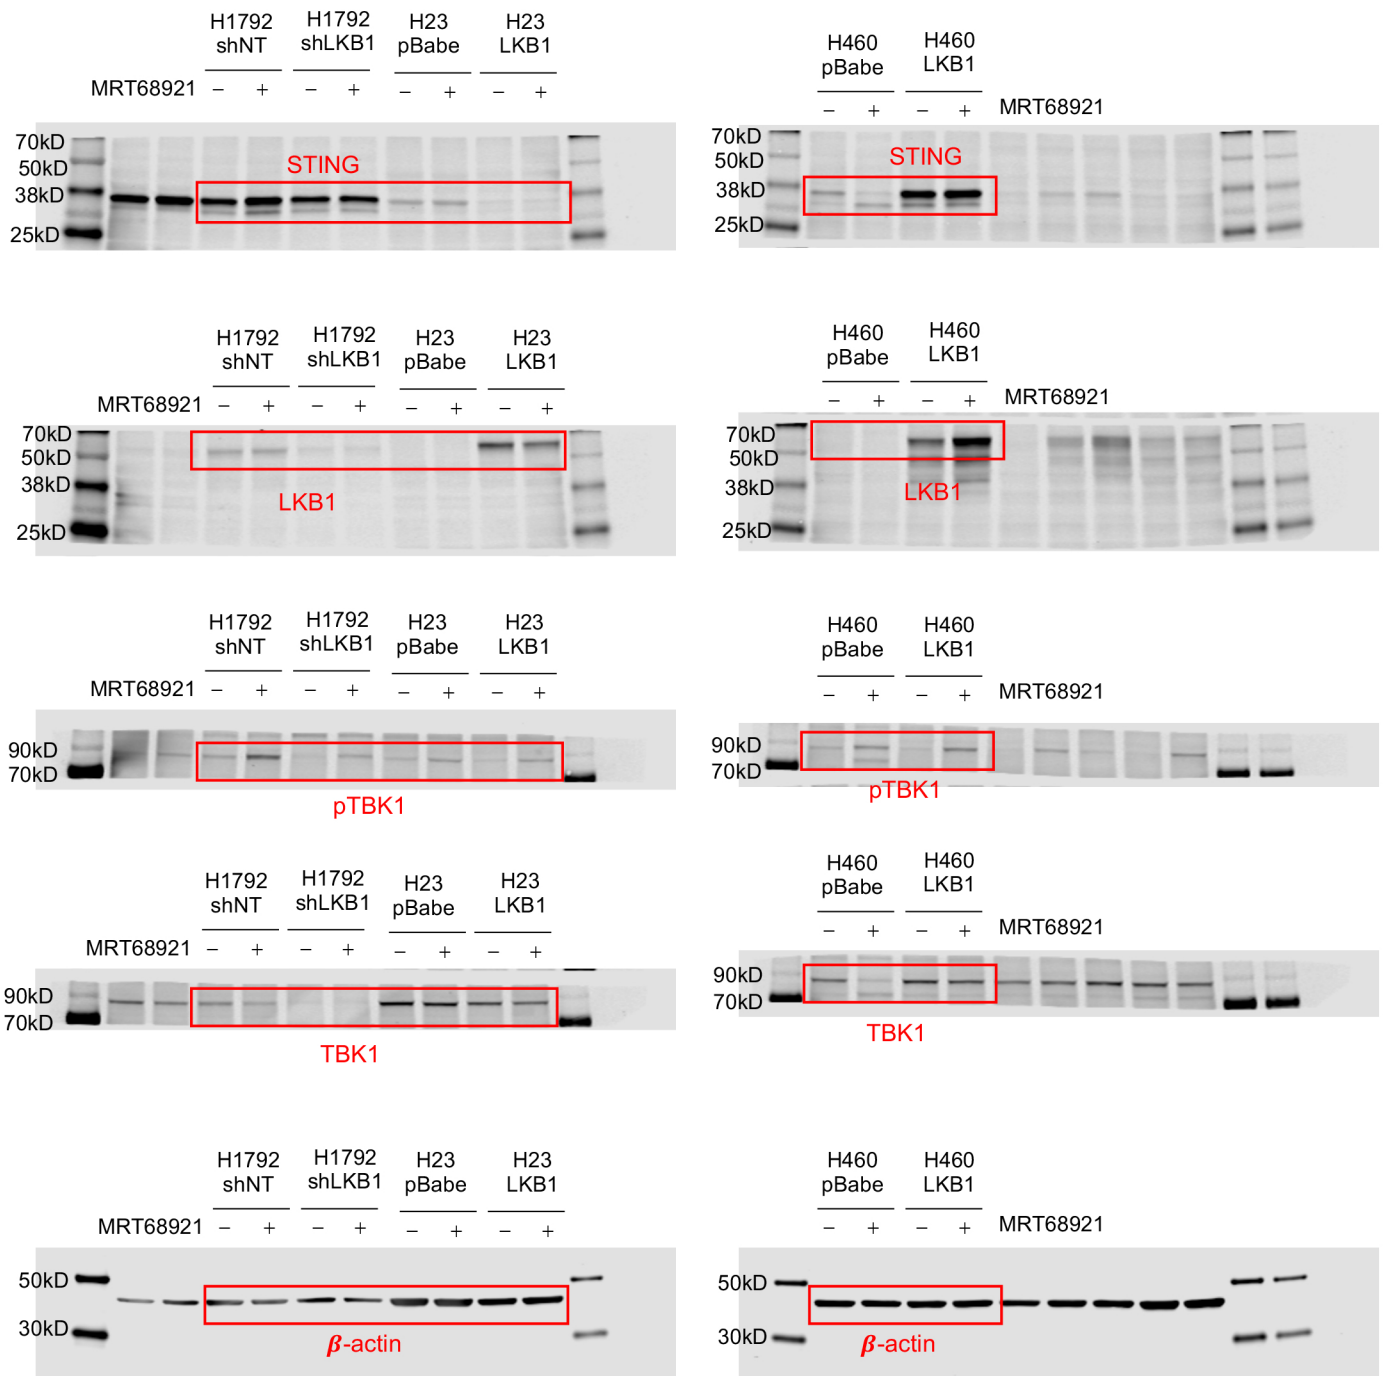

Source Data Extended Data Fig. 6i

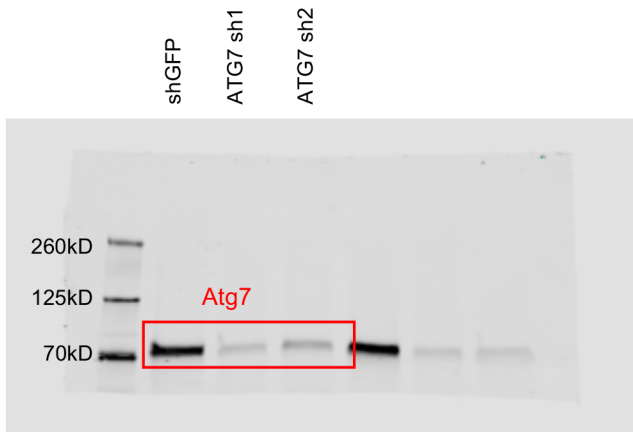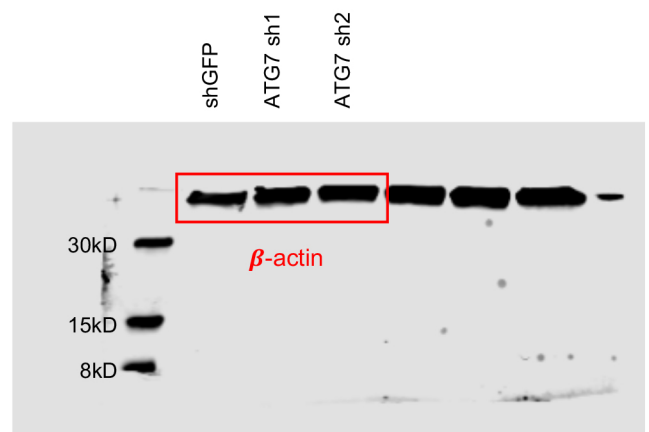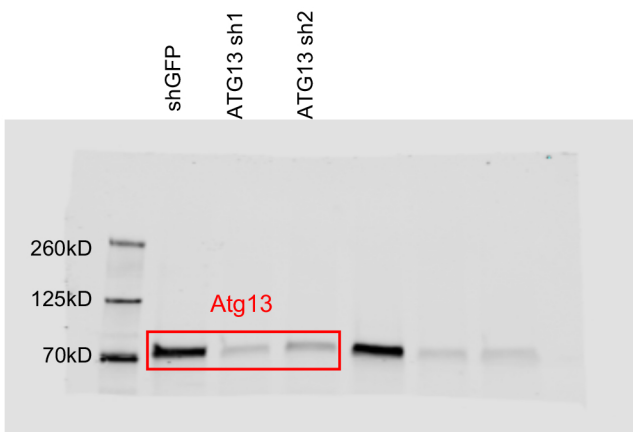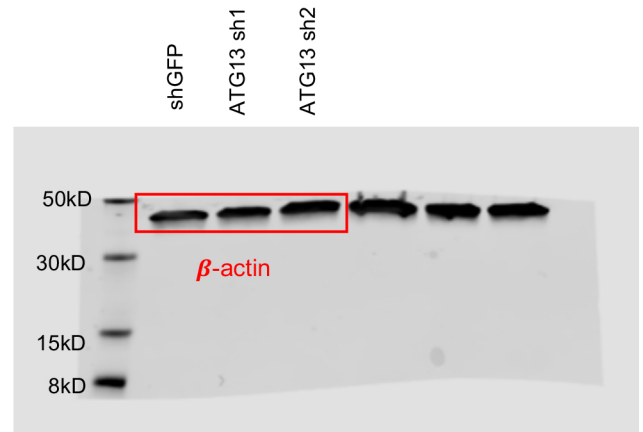

Supplement: NIHMS1692852-supplement-source_data_Fig__S6_WB.pdf [file NIHMS1692852-supplement-source_data_Fig__S6_WB.pdf]

Source Data Extended Data Fig. 7c

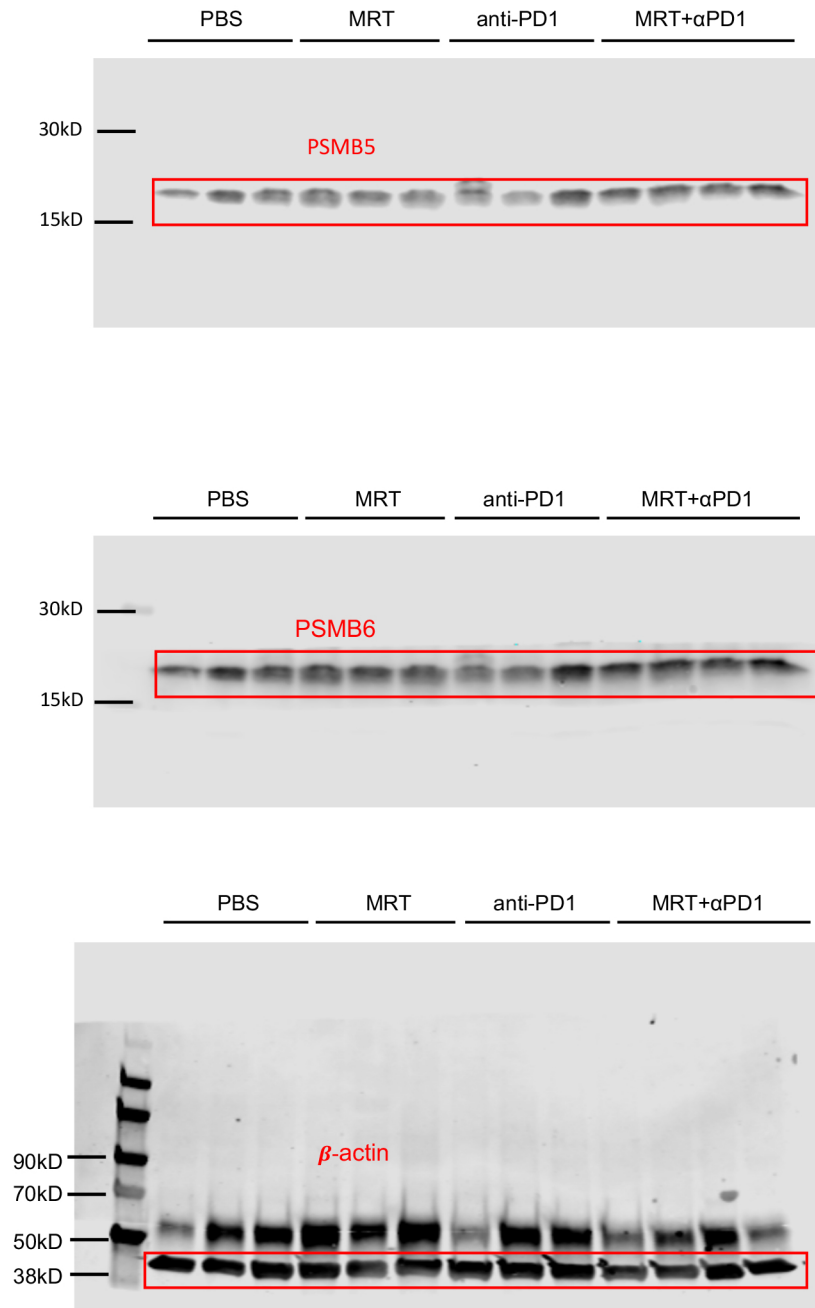

Supplement: NIHMS1692852-supplement-source_data_Fig__S7_WB.pdf [file NIHMS1692852-supplement-source_data_Fig__S7_WB.pdf]
